# Supplementary material for: Char strengthened by carbon microspheres formed in situ during combustion of IFR/EVA composites catalyzed by solid super acid
Source: Royal Society of Chemistry journal article supplement (doi:10.1039/c4ra04255g), 2014-07-16
Supplement: c4ra04255g1.pdf [file c4ra04255g1.pdf]

Table S1

TGA data of flame retardant EVA composites in air

| Samples | $T_{5wt\%}$<br>(°C) | $T_{10wt\%}$<br>(°C) | $T_{15wt\%}$<br>(°C) | $T_{50wt\%}$<br>(°C) | Residues at<br>600°C (%) | Residues at<br>800°C (%) |
|---------|---------------------|----------------------|----------------------|----------------------|--------------------------|--------------------------|
| EVA0    | 309.3               | 325.1                | 337.5                | 430.2                | 0.6                      | 0.6                      |
| EVA1    | 301.1               | 323.6                | 333.8                | 437.3                | 8.2                      | 2.1                      |
| EVA6    | 309.6               | 325.8                | 335.6                | 444.1                | 8.9                      | 2.5                      |
| EVA7    | 309.1               | 326.5                | 337.3                | 435.5                | 8.7                      | 3.1                      |
| EVA8    | 307.3               | 324.6                | 334.1                | 437.8                | 9.4                      | 3.5                      |
| EVA9    | 312.1               | 328.1                | 338.6                | 435.5                | 8.2                      | 2.4                      |
| EVA12   | 299.8               | 324.6                | 335.6                | 436.6                | 9.9                      | 2.9                      |

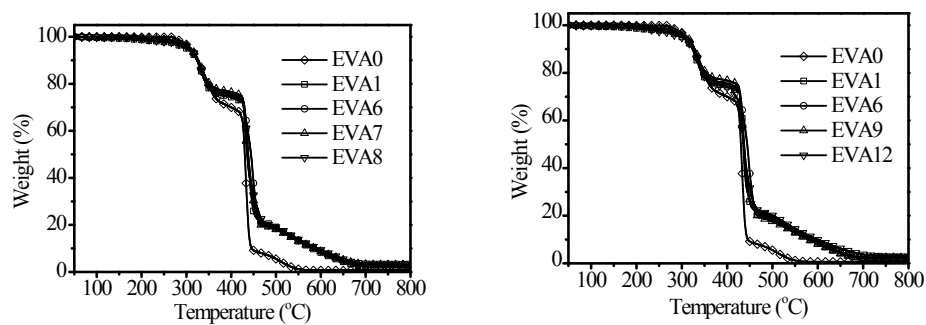

Fig. S1 TGA of IFR/EVA/SSA composites under air
